# Supplementary material for: Exploring digital health interventions for pregnant women at high risk for pre-eclampsia and eclampsia in low-income and-middle-income countries: a scoping review
Source: HighWire-hosted journal article supplement (doi:10.1136/bmjopen-2021-056130), 2022-02-01
Supplement: bmjopen-2021-056130supp005_data_supplement.pdf [file bmjopen-2021-056130supp005_data_supplement.pdf]

## Supplementary File 5- Digital Health Intervention Characteristics

| Reference           | Digital health intervention                                                      | Validated     | Intervention use for                                                                                                                                                                                                         | Technological component(s)                                                                                         | Targeted primary user              | User training |
|---------------------|----------------------------------------------------------------------------------|---------------|------------------------------------------------------------------------------------------------------------------------------------------------------------------------------------------------------------------------------|--------------------------------------------------------------------------------------------------------------------|------------------------------------|---------------|
| Musyoka et al. [25] | 24-hour ambulatory blood pressure monitoring system                              | Validated     | Blood pressure data collection                                                                                                                                                                                               | F1 smart wristwatch<br>Blood Pressure Monitoring Mobile Application<br>Cloud Data center<br>Caregiver's smartphone | Expectant mother and the caregiver | Not specified |
| Lim et al. [24]     | Pre-eclampsia Integrated Estimate of RiSk (PIERS) on the Move (PotM)             | Not specified | Demographics (gestational age at presentation), clinical signs (blood pressure, SPO2 and dipstick proteinuria), and symptoms (chest pain or dyspnoea, headache or visual disturbances, vaginal bleeding with abdominal pain) | mHealth platform                                                                                                   | Mid-level health workers           | Yes           |
| Vousden et al. [34] | CRADLE (Community blood pressure monitoring in Rural Africa & Asia: Detection of | Validated     | Measures blood pressure, pulse and calculates the mothers risk of shock<br><br>A traffic light Early Warning System display alerts users to                                                                                  | Microlife CRADLE VSA device                                                                                        | Healthcare providers               | Yes           |

|                      |                                                                                                                                                                                                                                                                                                       |               |                                                                                                                                                                                 |                                                                                                  |                                       |     |
|----------------------|-------------------------------------------------------------------------------------------------------------------------------------------------------------------------------------------------------------------------------------------------------------------------------------------------------|---------------|---------------------------------------------------------------------------------------------------------------------------------------------------------------------------------|--------------------------------------------------------------------------------------------------|---------------------------------------|-----|
|                      | underlying pre-Eclampsia and shock)<br>Vital Sign Alert                                                                                                                                                                                                                                               |               | abnormalities in the vital signs results.                                                                                                                                       |                                                                                                  |                                       |     |
| Nathan et al. [26]   | Microlife® CRADLE (Community blood pressure monitoring in Rural Africa & Asia: Detection of underlying pre-Eclampsia and shock) Vital Signs Alert (VSA)                                                                                                                                               | Validated     | Device accurately measures blood pressure and pulse. Traffic lights within the device help healthcare workers identify women who need additional treatment for these conditions | Microlife® CRADLE VSA device                                                                     | Healthcare providers                  | Yes |
| Feroz et al. [20]    | Hypothetical elemonitoring program                                                                                                                                                                                                                                                                    | Not specified | Blood pressure measurement                                                                                                                                                      | -                                                                                                | Pregnant women and caregiver          | -   |
| Dunsmuir et al. [19] | MiniPIERS AND FullPIERS models<br><br>Two versions of the POTM application, 1) Original version (application referred to as POTM), 2)Simplified, community-based version for the Community Level Interventions for Pre-eclampsia cluster randomized controlled trial (application referred to as CLIP | Not specified | Mean BP, SpO2, gestational age, proteinuria, symptoms.                                                                                                                          | Smartphone, mobile health applications (POTM/CLIP POTM), Research electronic data capture server | Community-based health care providers | Yes |

|                    | POTM)                                                                                                                                                                 |               |                                                                                        |                                                                 |                                                |     |
|--------------------|-----------------------------------------------------------------------------------------------------------------------------------------------------------------------|---------------|----------------------------------------------------------------------------------------|-----------------------------------------------------------------|------------------------------------------------|-----|
| Jonas et al. [21]  | Smartphone-based diagnostic test (Congo Red Dot) for preeclampsia                                                                                                     | Validated     | urine markers                                                                          | mHealth solution for administering the Congo Red Dot (CRD) test | Modestly trained personnel                     | Yes |
| Thakor et al. [32] | New device (Hypertension Detector for Developing Countries), intraarterial, sphygmomanometers, assorted automatic blood pressure devices, and proteinuria measurement | Not specified | Blood pressure measurement                                                             | -                                                               | Semi-literate volunteers with minimal training | Yes |
| Nathan et al. [27] | Microlife 3AS1-2 blood pressure device                                                                                                                                | Validated     | Measures blood pressure                                                                | Device                                                          | Staff with minimal training                    | Yes |
| Nathan et al. [28] | CRADLE Vital Signs Alert (VSA)                                                                                                                                        | Validated     | Measures BP and pulse to facilitate prompt recognition of abnormalities in vital signs | Device<br>Traffic light early warning system                    | Healthcare providers                           | yes |
| Payne et al. [29]  | miniPIERS risk prediction model                                                                                                                                       | Validated     | miniPIERS (measures demographics, symptoms and signs).                                 | Mobile health application                                       | Mid-level health workers                       | yes |
| Bellad et al. [17] | CLIP intervention package included miniPIERS model, PIERS On the Move (POM) tool, and                                                                                 | Validated     | Measure BP, pre-eclampsia symptoms and dipstick proteinuria                            | mobile-based CLIP POM mobile health application (app),          | Community health workers                       | yes |

|                           |                                                                                                                                                |           |                                                                                                                                                                                                   |                         |                                       |     |
|---------------------------|------------------------------------------------------------------------------------------------------------------------------------------------|-----------|---------------------------------------------------------------------------------------------------------------------------------------------------------------------------------------------------|-------------------------|---------------------------------------|-----|
|                           | Microlife BP 3AS1-2 device                                                                                                                     |           |                                                                                                                                                                                                   | central REDCap server   |                                       |     |
| Qureshi et al. [30]       | CLIP intervention package included miniPIERS model, Microlife BP 3AS1-2 device and PIERS On the Move (POM) mobile health (mHealth) application | Validated | BP measurement and pulse oximetry                                                                                                                                                                 | POM mHealth application | Lady health workers                   | Yes |
| Khowaja et al [22]        | CLIP intervention package PIERS On the Move (POM) mobile health (mHealth) application                                                          | Validated | Measure BP, pre-eclampsia symptoms and dipstick proteinuria                                                                                                                                       | POM mHealth application | Community-based health care providers | Yes |
| Khowaja et al [23]        | CLIP intervention package PIERS On the Move (POM) mobile health (mHealth) application                                                          | Validated | Measure BP, pre-eclampsia symptoms and dipstick proteinuria                                                                                                                                       | POM mHealth application | Community-based health care providers | Yes |
| Von Dadelszen et al. [33] | CRADLE BP device, pulse oximetry and TraCer platform, POM mHealth application                                                                  | Validated | CRADLE VSA semi-automated and validated BP device will be used for all clinical measurements of blood pressure (BP) in the study<br>pulse oximetry<br><br>POM platform to provide time-of-disease | POM mHealth application | Healthcare providers                  | Yes |

|                       |                                                                |               |                                                                                                                                                                                                               |                                                                                                                                      |                                        |               |
|-----------------------|----------------------------------------------------------------|---------------|---------------------------------------------------------------------------------------------------------------------------------------------------------------------------------------------------------------|--------------------------------------------------------------------------------------------------------------------------------------|----------------------------------------|---------------|
|                       |                                                                |               | risk estimates to hypertensive pregnant women using PIERS models                                                                                                                                              |                                                                                                                                      |                                        |               |
| Abejirinde et al [16] | Bliss4Midwives' (B4M)                                          | Not specified | non-invasive device for measuring haemoglobin via infrared sensors mounted on a finger clip; a self-inflating blood pressure cuff; and an automated reader for urinary protein and glucose through dipsticks. | Data from all diagnostic devices are automatically or manually linked to an android tablet equipped with decision support algorithms | Midwives and community health nurses   | Yes           |
| Bellad et al [18]     | Community Level Interventions for Pre-Eclampsia (CLIP) Package | Not specified | Measuring blood pressure                                                                                                                                                                                      | mHealth platform                                                                                                                     | Community-based health activists ASHAs | Not specified |
| Sharma et al [31]     | Community Level Interventions for Pre-Eclampsia (CLIP) Package | Not specified | Blood pressure measurement                                                                                                                                                                                    | PIERS On the Move (POM) mHealth tool, Microlife VSA blood pressure device                                                            | Community health workers               | Yes           |
